# Supplementary material for: Transposon Mutagenesis in Chlamydia trachomatis Identifies CT339 as a ComEC Homolog Important for DNA Uptake and Lateral Gene Transfer
Source: PubMed Central journal article supplement (PMC6686042; doi:10.1128/mbio.01343-19), 2019-08-06
Supplement: mBio.01343-19-sf001.pdf [file mBio.01343-19-sf001.pdf]

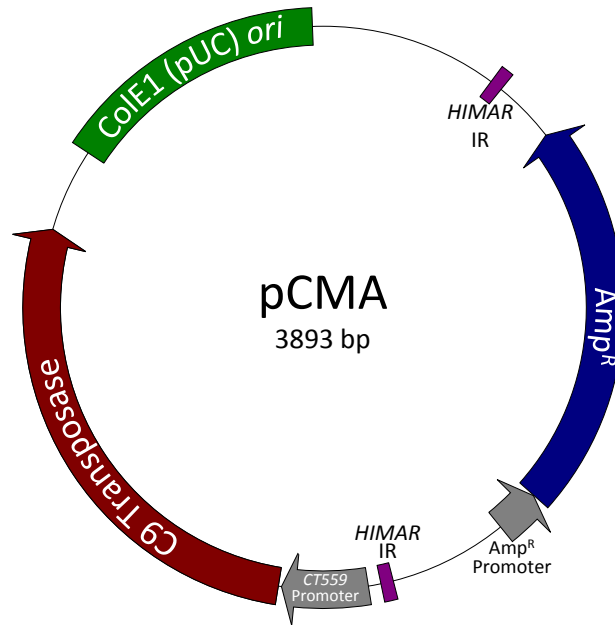

**Supplementary Figure 1. Plasmid map of pCMA.** The C9 hyperactive variant of the *Himar1* transposon was cloned downstream of the *Chlamydia ct559* promoter.  $\beta$ -lactamase (*bla*) and associated promoter was cloned from the chlamydial shuttle vector pGFP::SW2 (29). This antibiotic marker is flanked by *Himar1* inverted repeats to generate the transposon.
