# Supplementary material for: Transposon Mutagenesis in Chlamydia trachomatis Identifies CT339 as a ComEC Homolog Important for DNA Uptake and Lateral Gene Transfer
Source: PubMed Central journal article supplement (PMC6686042; doi:10.1128/mbio.01343-19), 2019-08-06
Supplement: mBio.01343-19-st001.pdf [file mBio.01343-19-st001.pdf]

Supplementary Table 1: Primers used in this study.

| <b>pCMA Plasmid Design (5'-3')</b>                 |                                                                                                                            |
|----------------------------------------------------|----------------------------------------------------------------------------------------------------------------------------|
| <b>Gene</b>                                        | <b>Primer Sequence and Designation</b>                                                                                     |
| C9 Transposase<br>( <b>EcoRI/AatI</b> )            | GCGGAATTCCGGCCGATGGAAAAAAGGAATTTTCGTGTTTTG<br>GCGACGTC TTATTATTCAACATAGTTCCTTCAAG                                          |
| pCMT Tet fragment<br>with HIMAR IR ( <b>XmaI</b> ) | GCCCCGGGTAACAGGTTGGCTGATAAGTCCCCGGTCTTTGGTAGCTCAGAGAACCTTCG<br>GCCCCGGGTAACAGGTTGGCTGATAAGTCCCCGGTCTCTGGAGATGGCGGACGCGATGG |
| pCMT amplicon<br>( <b>NcoI</b> )                   | NNNNNNCCATGGACTGTCAGACCAAGTTTACTC<br>NNNNNNCCATGGCTGACGTCTTATTATTCAACATAG                                                  |
| pSW2 $\beta$ -lactamase<br>(LIC- <b>HindIII</b> )  | GACCATGATTACGCCAAGCTAACAGGTTGGCTGATAAGTCCCCGGTCTGACGCTCAGTGG<br>CAGCTTATCATCGATAAGCTTAGACGTCAGGTGGCAC                      |
| CT559 promoter<br>(LIC - <b>EagI</b> )             | ACCGAGCTCGAATTCCGGCCGCCCATTCGTTTCGTTCTAG<br>TTCCTTTTTTCCATCGGCCGCACACCTTTTCACTCAC                                          |
| <b>Droplet Digital PCR (ddPCR) (5'-3')</b>         |                                                                                                                            |
| <b>Gene</b>                                        | <b>Primer Sequence and Designation</b>                                                                                     |
| <i>secY</i>                                        | TAAAAAGCCGTGTCATTCGTCC<br>TCGGCTTCAATCATTGTACAGC                                                                           |
| <i>secY</i> Probe                                  | /56-FAM/TAATTTACG/ZEN/CTTCCCTTGATCCGGC/3IABkFQ/                                                                            |
| <i>rpp30</i>                                       | CTCTTCCAGTGTGCAAGAAAGC<br>AGTGACTGATGAGCTACGAAGG                                                                           |
| <i>rpp30</i> Probe                                 | /5HEX/TGAGACGAGTCCTGAGTCTC/3IABkFQ/                                                                                        |
